# Supplementary material
Source: HighWire-hosted journal article supplement (https://erj.ersjournals.com/content/53/3/1802003)
Supplement: inline-supplementary-material-1 [file inline-supplementary-material-1.pdf]

**Adjunctive vitamin D in tuberculosis treatment: meta-analysis of individual participant data. Online data supplement.**

**Search Strategies.**

**A. PubMed**

***Cochrane Highly Sensitive Search Strategy for identifying randomized controlled trials***

#1. randomized controlled trial [pt] OR controlled clinical trial [pt] OR randomized [tiab] OR placebo [tiab] OR drug therapy [sh] OR randomly [tiab] OR trial [tiab] OR groups [tiab]

#2. animals [mh] NOT humans [mh]

#3. #1 NOT #2

***Terms specific to vitamin D***

#4. Vitamin D OR vitamin D2 OR vitamin D3 OR cholecalciferol OR ergocalciferol OR alphacalcidol OR alfacalcidol OR calcitriol OR paricalcitol OR doxerocalciferol

***Term specific to tuberculosis***

#5. Tuberculosis

***Combination of terms to identify randomized controlled trials of vitamin D conducted in patients with tuberculosis***

#3 AND #4 AND #5

**B. EMBASE**

***Terms for identifying randomized controlled trials***

#1 'randomized controlled trial'/exp OR 'single blind procedure'/exp OR 'double blind procedure'/exp OR 'crossover procedure'/exp

#2 random\*:ab,ti OR placebo\*:ab,ti OR crossover\*:ab,ti OR 'cross over':ab,ti OR allocat\*:ab,ti OR ((singl\* OR doubl\*) NEXT/1 blind\*):ab,ti OR trial:ti

#3. #1 OR #2

***Terms specific to vitamin D***

#4. vitamin AND d OR vitamin AND d2 OR vitamin AND d3 OR cholecalciferol OR ergocalciferol OR alphacalcidol OR alfacalcidol OR calcitriol OR paricalcitol OR doxerocalciferol

***Term specific to tuberculosis***

#5. tuberculosis

***Combination of terms to identify randomized controlled trials of vitamin D conducted in patients with tuberculosis***

#3 AND #4 AND #5

C. Cochrane Central

***Terms specific to vitamin D***

#1. Vitamin D OR vitamin D2 OR vitamin D3 OR cholecalciferol OR ergocalciferol OR alphacalcidol OR alfacalcidol OR calcitriol OR paricalcitol OR doxerocalciferol

***Term specific to tuberculosis***

#2. Tuberculosis

***Combination of terms to identify randomized controlled trials of vitamin D conducted in patients with tuberculosis***

#1 AND #2

D. Web of Science

TS =(Vitamin D OR vitamin D2 OR vitamin D3 OR cholecalciferol OR ergocalciferol OR alphacalcidol OR alfacalcidol OR calcitriol OR paricalcitol OR doxerocalciferol) AND TS =(Tuberculosis) AND TS =(placebo\* or random\* or clinical trial\* or double blind\* or single blind\* or rct)

## Results

**Supplementary Table S1:** Final treatment outcome by study and allocation<sup>1</sup>

|              | Ralph <i>et al</i> <sup>1</sup> |               | Wejse <i>et al</i> <sup>2</sup> |               |
|--------------|---------------------------------|---------------|---------------------------------|---------------|
|              | Placebo (n)                     | Vitamin D (n) | Placebo (n)                     | Vitamin D (n) |
| Cured        | 32                              | 36            | 59                              | 72            |
| Completed    | 6                               | 4             | 34                              | 29            |
| Failed       | 1                               | 0             | 0                               | 0             |
| Defaulted    | 0                               | 5             | 14                              | 9             |
| Died         | 0                               | 2             | 9                               | 12            |
| Transferred  | 2                               | 2             | 1                               | 2             |
| <b>Total</b> | <b>41</b>                       | <b>49</b>     | <b>117</b>                      | <b>124</b>    |

1, data on final treatment outcome were available for 90 participants in the trial by Ralph *et al* and 241 participants in the trial by Wejse *et al*.

**Supplementary Table S2: Baseline characteristics by allocation: all analyzed participants (n=1,850)**

|                                                                     | Placebo group (n=923) | Vitamin D group (n=927) |
|---------------------------------------------------------------------|-----------------------|-------------------------|
| <b>Mean baseline 25(OH)D concentration, nmol/L (SD)<sup>1</sup></b> | 41.0 (35.7)           | 41.3 (33.6)             |
| <b>Baseline 25(OH)D concentration (%)<sup>1</sup></b>               |                       |                         |
| <25 nmol/L                                                          | 359 (38.9)            | 329 (35.4)              |
| ≥25 nmol/L                                                          | 478 (51.8)            | 494 (53.3)              |
| <b>Mean age, years (SD)</b>                                         | 34.0 (13.8)           | 33.0 (13.0)             |
| <b>Age (%)</b>                                                      |                       |                         |
| <30 years                                                           | 450 (48.8)            | 467 (50.4)              |
| ≥30 years                                                           | 473 (51.2)            | 460 (49.6)              |
| <b>Sex (%)</b>                                                      |                       |                         |
| Male                                                                | 611 (66.2)            | 589 (63.5)              |
| Female                                                              | 312 (33.8)            | 338 (36.5)              |
| <b>Mean weight, kg (SD)<sup>2</sup></b>                             | 51.2 (11.3)           | 51.0 (10.9)             |
| <b>Multidrug resistance (%)<sup>3</sup></b>                         |                       |                         |
| No                                                                  | 619 (67.1)            | 600 (64.7)              |
| Yes                                                                 | 25 (2.7)              | 30 (3.2)                |
| <b>HIV status<sup>4</sup></b>                                       |                       |                         |
| Seronegative                                                        | 507 (54.9)            | 492 (53.1)              |
| Seropositive                                                        | 41 (4.4)              | 68 (7.3)                |
| <b>% zones involved, baseline CXR (%)<sup>5</sup></b>               |                       |                         |
| <50%                                                                | 362 (39.2)            | 359 (38.7)              |
| ≥50%                                                                | 146 (15.8)            | 137 (14.8)              |
| <b>Cavitation, baseline CXR (%)<sup>6</sup></b>                     |                       |                         |
| No                                                                  | 330 (35.8)            | 341 (36.8)              |
| Yes                                                                 | 334 (36.2)            | 324 (35.0)              |
| <b>Vitamin D Dosing Regimen (%)</b>                                 |                       |                         |
| Daily/weekly                                                        | 223 (24.2)            | 229 (24.7)              |
| Bolus/2-weekly                                                      | 700 (75.8)            | 698 (75.3)              |
| <b>FokI VDR genotype (%)<sup>7</sup></b>                            |                       |                         |
| FF                                                                  | 183 (19.8)            | 194 (20.9)              |
| Ff                                                                  | 150 (16.3)            | 149 (16.1)              |
| ff                                                                  | 36 (3.9)              | 20 (2.2)                |
| <b>TaqI VDR genotype (%)<sup>8</sup></b>                            |                       |                         |
| TT                                                                  | 258 (28.0)            | 245 (26.4)              |
| Tt                                                                  | 140 (15.2)            | 140 (15.1)              |
| tt                                                                  | 29 (3.1)              | 32 (3.5)                |

25(OH)D, 25-hydroxyvitamin D; CXR, chest radiograph; SD, standard deviation; HIV, human immunodeficiency virus; VDR, vitamin D receptor.

1. Data available for n=837 in the placebo group and n=823 in the vitamin D group; 2. Data available for n=906 in the placebo group and n=914 in the vitamin D group; 3. Data available for n=644 in the placebo group and n=630 in the vitamin D group; multidrug resistance defined as being resistant to both isoniazid and rifampicin, at least; 4. Data available for n=548 in the placebo group and n=560 in the vitamin D group; 5. Data available for n=408 in the placebo group and n=496 in the vitamin D group; 6. Data available for n=664 in the placebo group and n=665 in the vitamin D group; 7. Data available for n=369 in the placebo group and n=363 in the vitamin D group; 8. Data available for n=427 in the placebo group and n=417 in the vitamin D group.

**Supplementary Table S3:** Baseline characteristics by allocation: participants with multidrug-resistant tuberculosis (n=55)<sup>(1)</sup>

|                                                                       |                                                                        | Placebo group (n=25) | Vitamin D group (n=30) |
|-----------------------------------------------------------------------|------------------------------------------------------------------------|----------------------|------------------------|
| <b>Mean age, years (SD)</b>                                           |                                                                        | 30.7 (7.8)           | 31.8 (13.1)            |
| <b>Age (%)</b>                                                        | <30 years                                                              | 13 (52.0)            | 19 (63.3)              |
|                                                                       | ≥30 years                                                              | 12 (48.0)            | 11 (36.7)              |
| <b>Sex (%)</b>                                                        | Male                                                                   | 15 (60.0)            | 16 (53.3)              |
|                                                                       | Female                                                                 | 10 (40.0)            | 14 (46.7)              |
| <b>Mean baseline 25(OH)D concentration, nmol/L (SD)<sup>(2)</sup></b> |                                                                        | 21.6 (16.3)          | 26.7 (23.8)            |
| <b>Baseline 25(OH)D concentration (%)</b>                             | <25 nmol/L                                                             | 17 (68.0)            | 17 (56.7)              |
|                                                                       | ≥25 nmol/L                                                             | 7 (28.0)             | 12 (40.0)              |
|                                                                       | Not known                                                              | 1 (4.0)              | 1 (3.3)                |
| <b>Mean weight, kg (SD)</b>                                           |                                                                        | 54.1 (11.1)          | 55.5 (9.7)             |
| <b>HIV status (%)</b>                                                 | Seronegative                                                           | 11 (44.0)            | 13 (43.3)              |
|                                                                       | Seropositive                                                           | 0 (0.0)              | 1 (3.3)                |
|                                                                       | Not known                                                              | 14 (56.0)            | 16 (53.3)              |
| <b>Cavitation, baseline CXR (%)</b>                                   | No                                                                     | 13 (52.0)            | 21 (70.0)              |
|                                                                       | Yes                                                                    | 12 (48.0)            | 8 (26.7)               |
|                                                                       | Not known                                                              | 0 (0.0)              | 1 (3.3)                |
| <b>Vitamin D dosing Regimen (%)</b>                                   | Daily/weekly                                                           | 15 (60.0)            | 15 (50.0)              |
|                                                                       | Bolus/2-weekly                                                         | 10 (40.0)            | 15 (50.0)              |
| <b>Other adjunctive therapy (%)</b>                                   | Phenylbutyrate                                                         | 3 (12.0)             | 1 (3.3)                |
|                                                                       | L-arginine                                                             | 1 (4.0)              | 0 (0.0)                |
|                                                                       | Nil                                                                    | 21 (84.0)            | 29 (96.7)              |
| <b><i>FokI</i> VDR genotype (%)<sup>5</sup></b>                       | FF                                                                     | 2 (8.0)              | 6 (20.0)               |
|                                                                       | Ff                                                                     | 5 (20.0)             | 6 (20.0)               |
|                                                                       | ff                                                                     | 2 (8.0)              | 1 (3.3)                |
|                                                                       | Not known                                                              | 16 (64.0)            | 17 (56.7)              |
| <b><i>TaqI</i> VDR genotype (%)<sup>6</sup></b>                       | TT                                                                     | 9 (36.0)             | 13 (43.3)              |
|                                                                       | Tt                                                                     | 3 (12.0)             | 1 (3.3)                |
|                                                                       | tt                                                                     | 4 (16.0)             | 1 (3.3)                |
|                                                                       | Not known                                                              | 9 (36.0)             | 15 (50.0)              |
| <b>Antimicrobial sensitivity</b>                                      | Resistant to isoniazid and rifampicin only                             | 10 (40.0)            | 15 (50.0)              |
|                                                                       | Additionally resistant to at least one other anti-TB drug <sup>3</sup> | 15 (60.0)            | 15 (50.0)              |

25(OH)D, 25-hydroxyvitamin D; CXR, chest radiograph; SD, standard deviation; HIV, human immunodeficiency virus; VDR, vitamin D receptor.

1. Multidrug-resistant tuberculosis defined as resistance of isolate to both isoniazid and rifampicin, at least.
2. Baseline 25(OH)D concentration missing for 1 participant in the placebo group and 1 participant in the vitamin D group
3. Isolates additionally resistant to ethambutol, streptomycin or both

**Supplementary Table S4. Risk of Bias Assessment**

|                              | Sequence generation | Allocation concealment | Blinding of participants and personnel | Blinding of outcome assessment | Incomplete outcome data | Selective reporting | Other bias |
|------------------------------|---------------------|------------------------|----------------------------------------|--------------------------------|-------------------------|---------------------|------------|
| Wejse 2009 <sup>2</sup>      | ✓                   | ✓                      | ✓                                      | ✓                              | ? <sup>1</sup>          | ✓                   | ✓          |
| Martineau 2011 <sup>3</sup>  | ✓                   | ✓                      | ✓                                      | ✓                              | ✓                       | ✓                   | ✓          |
| Salahuddin 2013 <sup>4</sup> | ✓                   | ✓                      | ✓                                      | ✓                              | ✓                       | ✓                   | ✓          |
| Ralph 2013 <sup>1</sup>      | ✓                   | ✓                      | ✓                                      | ✓                              | ? <sup>1</sup>          | ✓                   | ✓          |
| Mily 2015 <sup>5</sup>       | ✓                   | ✓                      | ✓                                      | ✓                              | ? <sup>1</sup>          | ✓                   | ✓          |
| Daley 2015 <sup>6</sup>      | ✓                   | ✓                      | ✓                                      | ✓                              | ? <sup>1</sup>          | ✓                   | ✓          |
| Tukvadze 2015 <sup>7</sup>   | ✓                   | ✓                      | ✓                                      | ✓                              | ✓                       | ✓                   | ✓          |
| Ganmaa 2017 <sup>8</sup>     | ✓                   | ✓                      | ✓                                      | ✓                              | ✓                       | ✓                   | ✓          |

✓ = low risk of bias; ? = unclear risk of bias;

1, risk of bias due to incomplete outcome data assessed as 'unclear' due to relatively high rates of loss to follow-up (>20%)

**Supplementary Table S5: One-step individual participant data meta-analysis, safety outcomes**

|                                   | N participants (trials) | Proportion with ≥1 event, placebo group (%) | Proportion with ≥1 event, vitamin D group (%) | Adjusted odds ratio (95% CI) <sup>1</sup> | P value |
|-----------------------------------|-------------------------|---------------------------------------------|-----------------------------------------------|-------------------------------------------|---------|
| Hypercalcemia <sup>2</sup>        | 6                       | 39/639 (6.1)                                | 38/614 (6.2)                                  | 0.94 (0.55, 1.62)                         | 0.83    |
| Renal stones                      | 8                       | 0/923 (0.0)                                 | 0/927 (0.0)                                   | --                                        | --      |
| Serious Adverse Events, any cause | 8                       | 32/923(3.5)                                 | 33/927 (3.6)                                  | 0.99 (0.59, 1.65)                         | 0.96    |
| Withdrawals/loss to follow-up     | 8                       | 124/923 (13.4)                              | 117/927 (12.6)                                | 0.96 (0.73, 1.27)                         | 0.79    |
| Total Deaths                      | 8                       | 21/923 (2.3)                                | 23/927 (2.5)                                  | 1.09 (0.59, 2.03)                         | 0.79    |

1, adjusted for age, sex and clustering between trials

2, hypercalcemia defined as serum calcium concentration >2.65 mmol/L; serum calcium concentration was corrected for serum albumin concentration where this was also measured (4/6 studies). In all studies where serum calcium concentrations were measured, this was done routinely i.e. irrespective of symptoms

**Supplementary Table S6:** One-step individual participant data meta-analysis, responder analysis

|                                             | N participants<br>(N trials) | Median time to sputum culture conversion, days (IQR) | Adjusted hazard ratio<br>(95% CI) | P value |
|---------------------------------------------|------------------------------|------------------------------------------------------|-----------------------------------|---------|
| Intervention, end-study 25(OH)D < 75 nmol/L | 34 (3)                       | 28 (28, 56)                                          | Referent                          |         |
| Intervention, end-study 25(OH)D ≥ 75 nmol/L | 232 (4)                      | 28 (28, 53)                                          | 0.95 (0.63, 1.41)                 | 0.78    |

**Supplementary Figure S1:** Funnel plot for individual patient data meta-analysis of time to sputum culture conversion.

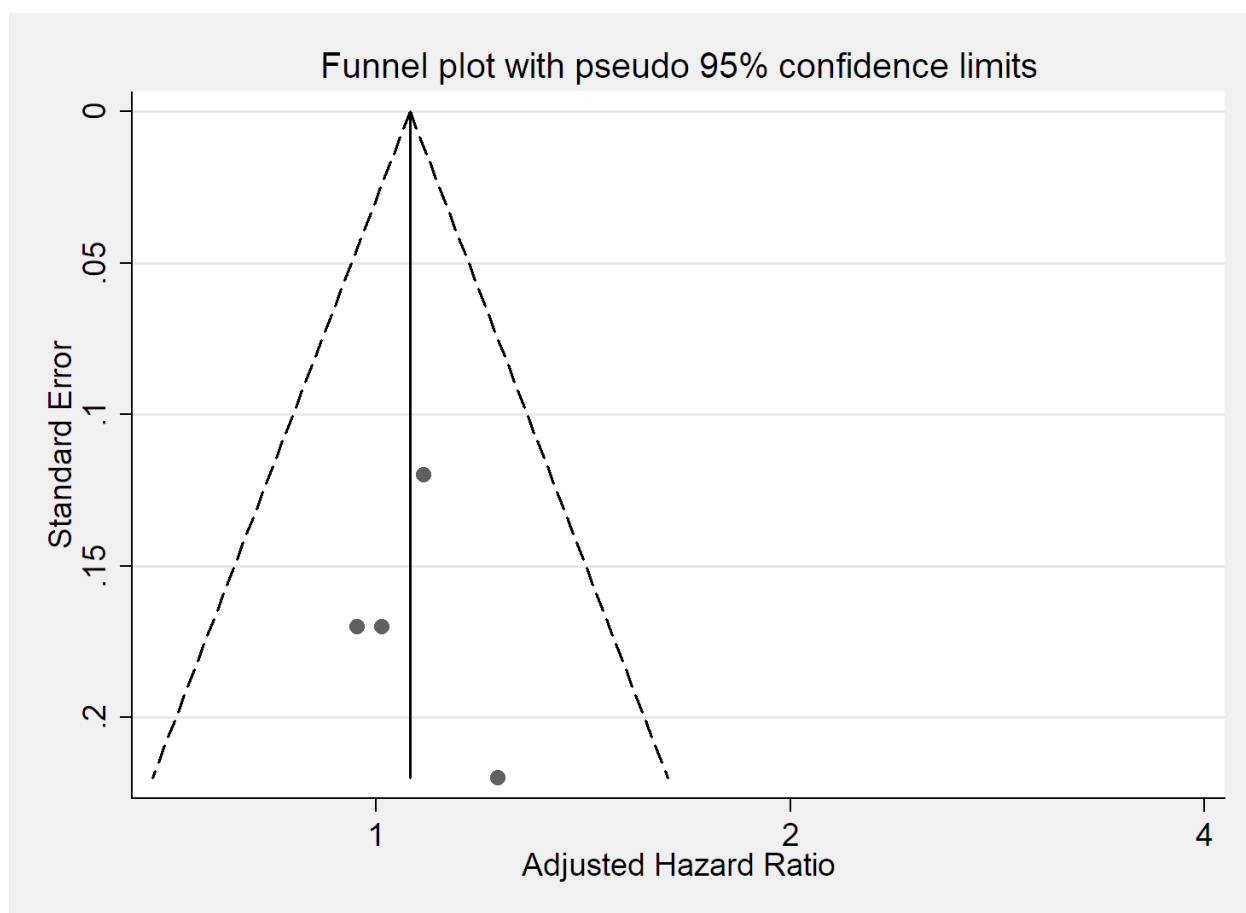

## References

1. Ralph AP, Waramori G, Pontororing GJ, et al. L-arginine and vitamin D adjunctive therapies in pulmonary tuberculosis: a randomised, double-blind, placebo-controlled trial. *PLoS ONE* 2013; **8**(8): e70032.
2. Wejse C, Gomes VF, Rabna P, et al. Vitamin D as supplementary treatment for tuberculosis: a double-blind, randomized, placebo-controlled trial. *Am J Respir Crit Care Med* 2009; **179**(9): 843-50.
3. Martineau AR, Timms PM, Bothamley GH, et al. High-dose vitamin D<sub>3</sub> during intensive-phase antimicrobial treatment of pulmonary tuberculosis: a double-blind randomised controlled trial. *Lancet* 2011; **377**(9761): 242-50.
4. Salahuddin N, Ali F, Hasan Z, Rao N, Aqeel M, Mahmood F. Vitamin D accelerates clinical recovery from tuberculosis: results of the SUCCINCT Study [Supplementary Cholecalciferol in recovery from tuberculosis]. A randomized, placebo-controlled, clinical trial of vitamin D supplementation in patients with pulmonary tuberculosis'. *BMC Infectious Diseases* 2013; **13**: 22.
5. Mily A, Rekha RS, Kamal SM, et al. Significant Effects of Oral Phenylbutyrate and Vitamin D3 Adjunctive Therapy in Pulmonary Tuberculosis: A Randomized Controlled Trial. *PLoS ONE* 2015; **10**(9): e0138340.
6. Daley P, Jagannathan V, John KR, et al. Adjunctive vitamin D for treatment of active tuberculosis in India: a randomised, double-blind, placebo-controlled trial. *Lancet Infect Dis* 2015; **15**(5): 528-34.
7. Tukvadze N, Sanikidze E, Kipiani M, et al. High-dose vitamin D3 in adults with pulmonary tuberculosis: a double-blind randomized controlled trial. *Am J Clin Nutr* 2015; **102**(5): 1059-69.
8. Ganmaa D, Munkhzul B, Fawzi W, et al. High-Dose Vitamin D3 During Tuberculosis Treatment in Mongolia: A Randomised Controlled Trial. *Am J Respir Crit Care Med* 2017; **195**(5): 628-37.
